# Supplementary material for: Optimization and Application of a Multiplex Digital PCR Assay for the Detection of SARS-CoV-2 Variants of Concern in Belgian Influent Wastewater
Source: MDPI journal article supplement (doi:10.3390/v14030610), 2022-03-15
Supplement: s1 [file s1]

# Supplementary information

## Optimization and application of a multiplex digital PCR assay for the detection of SARS-CoV-2 variants of concern in Belgian influent wastewater

Tim Boogaerts<sup>1,\*</sup>, Siel Van den Bogaert<sup>2,\*</sup>, Laura A.E. Van Poelvoorde<sup>3</sup>, Diala El Masri<sup>2</sup>, Naomi De Roeck<sup>2</sup>, Nancy H. C. Roosens<sup>3</sup>, Marie Lesenfants<sup>4</sup>, Lies Lahousse<sup>5</sup>, Koenraad Van Hoorde<sup>6</sup>, Alexander L.N. van Nuijs<sup>1,\*\*</sup>, Peter Delputte<sup>2,\*\*</sup>

*1 Toxicological Centre, University of Antwerp, Universiteitsplein 1 2610 Wilrijk, Belgium.*

*2 Laboratory for Microbiology, Parasitology and Hygiene, University of Antwerp, Universiteitsplein 1 2610 Wilrijk, Belgium*

*3 Scientific directorate of Biological health risks, Service Transversal activities in Applied Genomics, Sciensano, J. Wytsmanstraat 14, 1050, Brussels, Belgium*

*4 Scientific Directorate of Epidemiology and Public Health, Service Epidemiology of infectious diseases, Sciensano, J. Wytsmanstraat 14, 1050, Brussels, Belgium*

*5 Department of Bioanalysis, Ghent University, Ottergemsesteenweg 460, 9000 Ghent, Belgium*

*6 Scientific Directorate of Infectious diseases in humans, Service Foodborne pathogens, Sciensano, J. Wytsmanstraat 14, 1050, Brussels, Belgium*

\* joint first author

\*\* joint senior author

Corresponding author: [Tim.Boogaerts@uantwerpen.be](mailto:Tim.Boogaerts@uantwerpen.be)

## Supplementary information

**Table S1 In-silico inclusivity and specificity of the different PCR targets**

| Assay | Name_probe               | Sequence_probe              | Inclusivity | FN        | Target variant | Match target variant | Match target variant (#seq) | #Other variants (>50%) | #Other variants (>50%) (#seq) |
|-------|--------------------------|-----------------------------|-------------|-----------|----------------|----------------------|-----------------------------|------------------------|-------------------------------|
| 1     | Del69_70-Forward         | TCAACTCAGGACTTGTCTTACCT     | 98.39%      | 38 441    | B.1.1.7        | 99.27%               | 558 458                     |                        |                               |
| 1     | Del69_70-Reverse         | GTTTGATAACCCGTGCTACCA       | 98.52%      | 35 419    | B.1.1.7        | 99.50%               | 558 458                     |                        |                               |
| 1     | Del69_70-probe           | TTCCATGCTATACATGTCTCTGGGA   | 74.19%      | 617 280   | B.1.1.7        | 99.91%               | 558 458                     | 58                     | 589 314                       |
| 2     | B.1.1.7_Specific-Forward | GTTCTTACCTTTCTTTCCAATGTTAC  | 99.14%      | 20 486    | B.1.1.7        | 99.43%               | 558 458                     |                        |                               |
| 2     | B.1.1.7_Specific-Reverse | CCCTGTCCTACCATTTAATGATGG    | 99.39%      | 14 521    | B.1.1.7        | 99.60%               | 558 458                     |                        |                               |
| 2     | B.1.1.7_Specific-Probe   | TGGTTCATGCTATCTCTGGGACC     | 24.06%      | 1 816 229 | B.1.1.7        | 98.89%               | 558 458                     | 35                     | 19 858                        |
| 3     | N501YMutation-Forward    | CATATGGTTTCCAACCCACTT       | 26.27%      | 1 763 377 | B.1.1.7        | 99.85%               | 558 458                     | 48                     | 64 129                        |
| 3     | N501YMutation-Reverse    | ACTTTCTTTTGAAGTTCTACATGCACC | 99.55%      | 10 749    | B.1.1.7        | 99.62%               | 558 458                     |                        |                               |
| 3     | N501YMutation-Probe      | TGGTGTGGTTACCAACCATACAGAG   | 99.42%      | 13 958    | B.1.1.7        | 99.63%               | 558 458                     |                        |                               |
| 4     | B.1.351_Specific-Forward | AGATTTGCCAATAGGTATTAACATC   | 99.41%      | 14 131    | B.1.351        | 99.89%               | 5 694                       |                        |                               |
| 4     | B.1.351_Specific-Reverse | GACTCCTGGTGATTCTTCTTCAG     | 96.87%      | 74 747    | B.1.351        | 98.03%               | 5 694                       |                        |                               |
| 4     | B.1.351_Specific-Probe   | CTAGGTTTCAAACCTTACATAGAAGTT | 0.29%       | 2 384 704 | B.1.351        | 98.70%               | 231                         | 3                      | 5 842                         |
| 5     | B.1.617.2-F21989         | GTTTATTACCACAAAAACAACAAAG   | 73.22%      | 640 369   | B.1.617.2      | 99.19%               | 61 612                      |                        |                               |
| 5     | B.1.617.2-R22083         | CACTTTTGAATATGTCTCTCAGCC    | 99.47%      | 12 790    | B.1.617.2      | 99.61%               | 61 612                      |                        |                               |
| 5     | S157                     | TGGATGGAAAGTGGAGTTATTCTAGT  | 51.87%      | 1 151 056 | B.1.617.2      | 97.74%               | 61 612                      | 183                    | 1 179 097                     |

**Table S2 In-silico specificity of the final dPCR target list on the different variants of concern (VOC) and variants of interest (VOI)**

| WHO Label | Data of designation | Lineage   | First detection in country    | Spike mutations of interest                                                                                                                                                                                                                       | Additional AA changes monitored | Evidence for impact on transmissibility | Evidence for impact on immunity | Evidence for impact on severity | S-N501Y | SΔ69/70 deletion | S-del L242-244L | S-del 156-157 |
|-----------|---------------------|-----------|-------------------------------|---------------------------------------------------------------------------------------------------------------------------------------------------------------------------------------------------------------------------------------------------|---------------------------------|-----------------------------------------|---------------------------------|---------------------------------|---------|------------------|-----------------|---------------|
| Alpha     | 18-12-20            | B.1.1.7   | UK (Sep-2020)                 | N501Y, D614G, P681H                                                                                                                                                                                                                               | E484K & L452R                   | Yes                                     | No                              | Yes                             | X       | X                |                 |               |
| Beta      | 18-12-20            | B.1.351   | South Africa (May-2020)       | K417N, E484K, N501Y, D614G, A701V                                                                                                                                                                                                                 | L18F                            | Yes                                     | Yes                             | Yes                             | X       |                  | X               |               |
| Gamma     | 11-01-20            | P.1       | Brazil (Nov-2020)             | K417T, E484K, N501Y, D614G, H655Y                                                                                                                                                                                                                 | P681H                           | Yes                                     | Yes                             | Yes                             | X       |                  |                 |               |
| Delta     | 11-05-21            | B.1.617.2 | India (Oct-2020)              | L452R, T478K, D614G, P681R                                                                                                                                                                                                                        | K417N                           | Yes                                     | Yes                             | Yes                             |         |                  |                 | X             |
| Omicron   | 26-11-21            | B.1.1.529 | Multiple countries (Nov-2021) | A67V, Δ69-70, T95I, G142D, Δ143-145, N211I, Δ212, ins215EPE, G339D, S371L, S373P, S375F, K417N, N440K, G446S, S477N, T478K, E484A, Q493R, G496S, Q498R, N501Y, Y505H, T547K, D614G, H655Y, N679K, P681H, N764K, D796Y, N856K, Q954H, N969K, L981F |                                 | Yes                                     | Yes                             |                                 | X       | X                |                 |               |
| -         | 22-04-21            | B.1.620   | Unclear                       | S477N, E484K, D614G, P681H                                                                                                                                                                                                                        |                                 |                                         | Yes                             |                                 |         | X                | (X)             |               |
| Mu        | 30-08-21            | B.1.621   | Colombia                      | R346K, E484K, N501Y, D614G, P681H                                                                                                                                                                                                                 |                                 | Yes                                     | Yes                             |                                 | X       |                  |                 |               |
| Lambda    | 14-06-21            | C.37      | Peru                          | L452Q, F490S, D614G                                                                                                                                                                                                                               |                                 |                                         | Yes                             |                                 |         |                  |                 |               |
| Eta       | 17-03-21            | B.1.525   | Multiple countries            | E484K, D614G, Q677H                                                                                                                                                                                                                               |                                 |                                         | Yes                             |                                 |         | X                |                 |               |
| Iota      | 24-03-21            | B.1.526   | US                            | E484K, D614G, A701V                                                                                                                                                                                                                               |                                 |                                         | Yes                             |                                 |         |                  |                 |               |
| Kappa     | 04-04-21            | B.1.617.1 | India                         | L452R, E484Q, D614G, P681R                                                                                                                                                                                                                        |                                 | Yes                                     | Yes                             |                                 |         |                  |                 |               |

**Table S1** Assessment of the LOD95% of the different variant specific primer sets. For each concentration level, the positive detection rate (%) among replicates was given in *italics* together with the mean copy number (copies/ $\mu$ L  $\pm$  standard deviation) as observed with the dPCR method.

|                                         | <b>Del69/70</b>                | <b>N501Y</b>                  | <b>B.1.1.7</b>                 | <b>B.1.351</b>                | <b>B.1.617.2</b>                |
|-----------------------------------------|--------------------------------|-------------------------------|--------------------------------|-------------------------------|---------------------------------|
| <b>L1</b>                               | <i>100%</i><br>221.1 $\pm$ 9.6 | <i>100%</i><br>92.4 $\pm$ 1.8 | <i>100%</i><br>131.8 $\pm$ 5.9 | <i>100%</i><br>14.0 $\pm$ 5.6 | <i>100%</i><br>369.8 $\pm$ 22.3 |
| <b>L2</b>                               | <i>100%</i><br>112.7 $\pm$ 1.8 | <i>100%</i><br>41.8 $\pm$ 0.7 | <i>100%</i><br>62.9 $\pm$ 7.1  | <i>100%</i><br>7.7 $\pm$ 0.4  | <i>100%</i><br>181.7 $\pm$ 5.1  |
| <b>L3</b>                               | <i>100%</i><br>39.8 $\pm$ 1.0  | <i>100%</i><br>13.2 $\pm$ 1.2 | <i>100%</i><br>26.2 $\pm$ 1.5  | <i>100%</i><br>3.4 $\pm$ 1.8  | <i>100%</i><br>73.2 $\pm$ 5.4   |
| <b>L4</b>                               | <i>100%</i><br>20.3 $\pm$ 2.0  | <i>100%</i><br>6.7 $\pm$ 1.1  | <i>100%</i><br>11.8 $\pm$ 0.7  | <i>100%</i><br>1.3 $\pm$ 0.1  | <i>100%</i><br>37.7 $\pm$ 1.6   |
| <b>L5</b>                               | <i>100%</i><br>10.9 $\pm$ 1.1  | <i>100%</i><br>3.6 $\pm$ 0.4  | <i>100%</i><br>5.4 $\pm$ 0.5   | <i>100%</i><br>0.8 $\pm$ 0.4  | <i>100%</i><br>16.2 $\pm$ 3.5   |
| <b>L6</b>                               | <i>100%</i><br>4.3 $\pm$ 0.7   | <i>100%</i><br>1.2 $\pm$ 0.3  | <i>100%</i><br>2.6 $\pm$ 0.9   | <i>100%</i><br>0.4 $\pm$ 0.1  | <i>100%</i><br>8.7 $\pm$ 0.3    |
| <b>L7</b>                               | <i>100%</i><br>0.5 $\pm$ 0.2   | <i>66%</i><br>0.1 $\pm$ 0.1   | <i>100%</i><br>0.4 $\pm$ 0.2   | <i>33%</i><br>0.03 $\pm$ 0.06 | <i>33%</i><br>0.4 $\pm$ 0.8     |
| <b>LOD95% [95% confidence interval]</b> | <0.5                           | 0.3 [0.1; 1.7]                | <0.4                           | 0.4 [0.2; 1.3]                | 2.9 [0.4; 20.5]                 |
